# Supplementary material for: Elevational differences in hydrogeomorphic disturbance regime influence sediment residence times within mountain river corridors
Source: PubMed Central journal article supplement (PMC6527556; doi:10.1038/s41467-019-09864-w), 2019-05-20
Supplement: 41467_2019_9864_MOESM1_ESM.pdf [file 41467_2019_9864_MOESM1_ESM.pdf]

# Elevational differences in hydrogeomorphic disturbance regime influence sediment residence times within mountain river corridors

Nicholas A. Sutfin and Ellen Wohl

## Supplementary Information

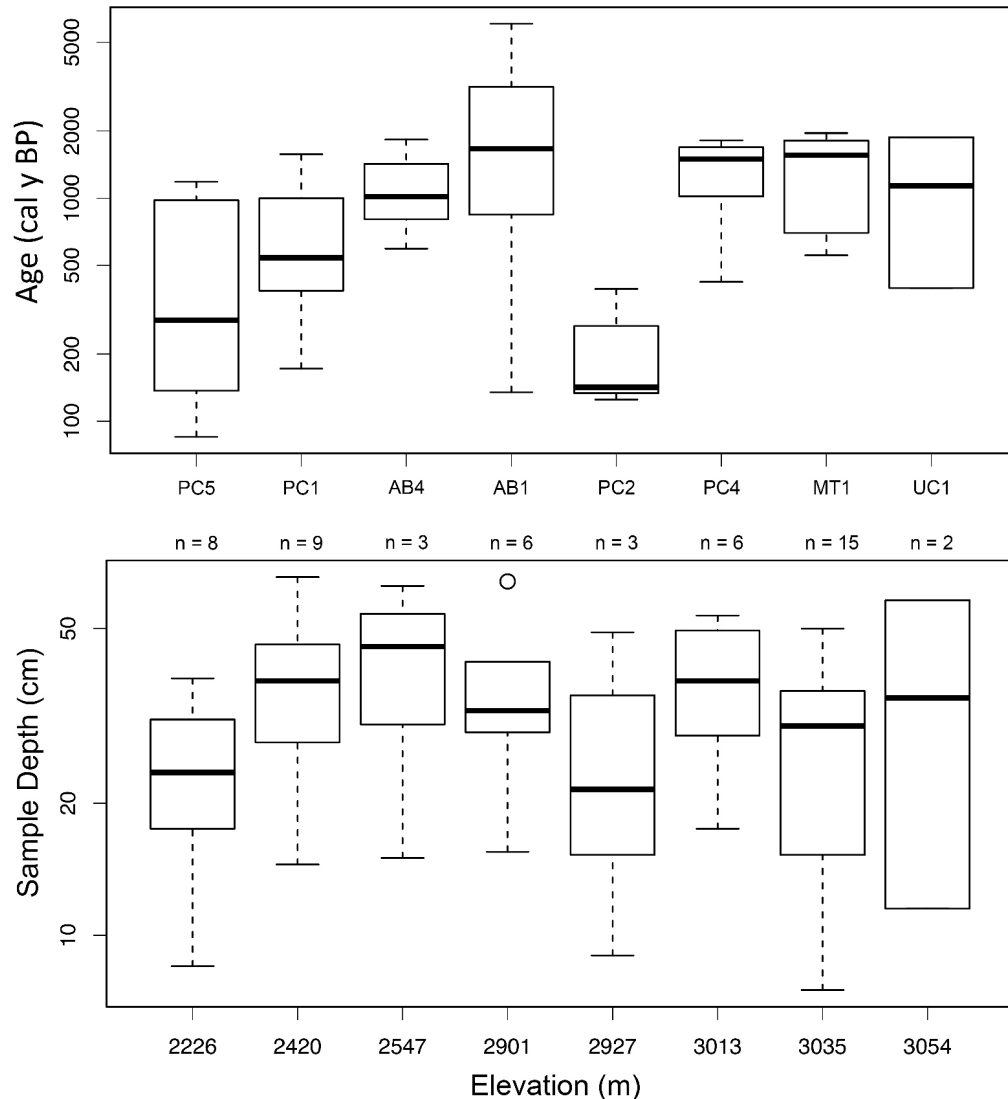

**Supplementary Figure S1.** Boxplots of charcoal sample weighted mean radiocarbon ages and depth. Plots for each study reach illustrate variability in sample depth and illustrate show that younger mean ages do not solely represent charcoal samples from more shallow depths. Thick lines represent the median (50<sup>th</sup> percentile), upper and lower edges of the boxes represent the 25<sup>th</sup> and 75<sup>th</sup> percentile. Whiskers extend to the minimum and maximum values within 1.5 times the interquartile range and open circles are outliers exceeding that range. Source data are provided as a Source Data file.

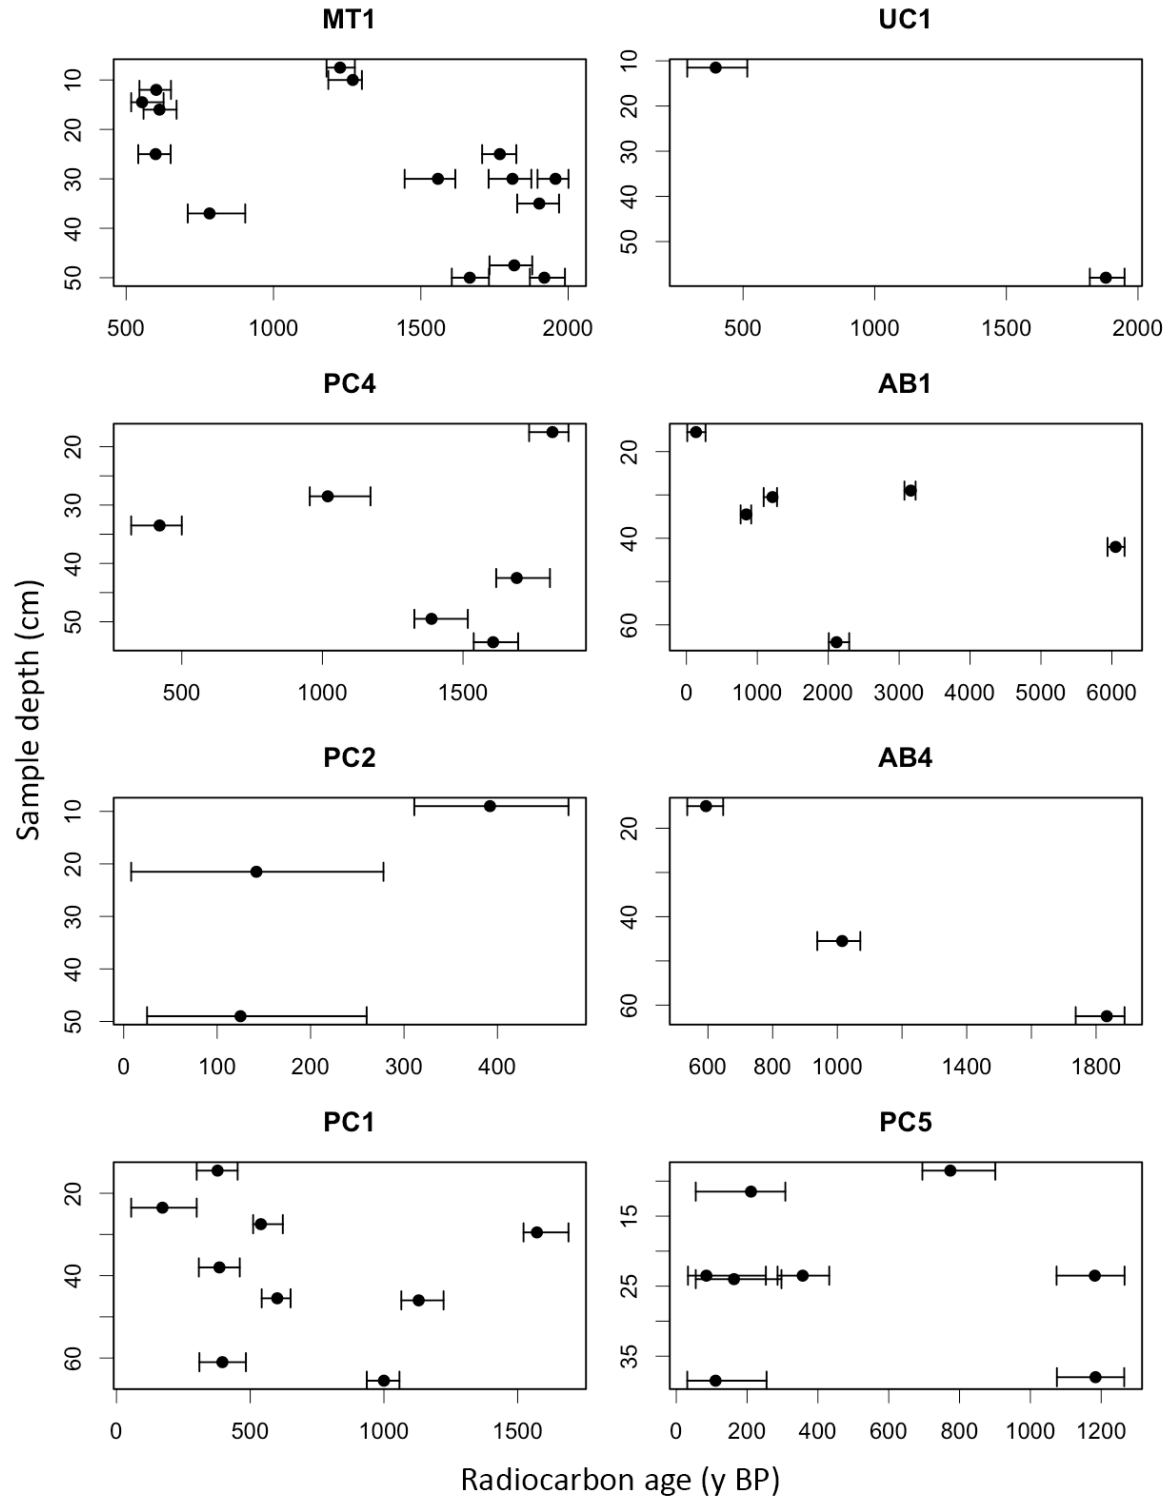

**Supplementary Figure S2.** Calibrated weighted mean radiocarbon ages with individual sample depth along each study reach. Mean ages represent years before 1950 and error bars indicate the 95% confidence level for age estimates. Source data are provided as a Source Data file.

**Supplementary Table S1.** Uncalibrated and calibrated <sup>14</sup>C ages.

| Sample    |                | Un-calibrated sample analysis |                            |                                 | Calibrated ages (y BP) |      |               |       |        |
|-----------|----------------|-------------------------------|----------------------------|---------------------------------|------------------------|------|---------------|-------|--------|
| Sample ID | Ave depth (cm) | <sup>14</sup> C age (y BP)    | <sup>14</sup> C Age SE (y) | delta <sup>13</sup> C (per mil) | Max                    | Min  | Weighted Mean | Sigma | Median |
| AB1S2.2   | 34.5           | 909                           | 23                         | -20.2                           | 914                    | 765  | 844           | 44    | 852    |
| AB1S3.1   | 15.5           | 121                           | 23                         | -23.1                           | 270                    | 12   | 135           | 78    | 114    |
| AB1S4.2   | 29             | 2989                          | 23                         | -21.6                           | 3232                   | 3075 | 3164          | 46    | 3170   |
| AB1S4.3   | 42             | 5267                          | 28                         | -18.8                           | 6179                   | 5939 | 6053          | 70    | 6052   |
| AB1S6.2   | 30.5           | 1256                          | 23                         | -21.2                           | 1278                   | 1090 | 1214          | 38    | 1220   |
| AB1S8.3   | 64             | 2131                          | 23                         | -20.7                           | 2296                   | 2008 | 2117          | 60    | 2115   |
| AB4S10.4  | 62.5           | 1887                          | 24                         | -15.4                           | 1888                   | 1737 | 1833          | 37    | 1840   |
| AB4S12    | 15             | 581                           | 25                         | -15.6                           | 647                    | 536  | 594           | 33    | 605    |
| AB4S6.3   | 45.5           | 1110                          | 29                         | -19.3                           | 1071                   | 938  | 1015          | 37    | 1013   |
| MT1S12    | 30             | 1654                          | 24                         | -18.7                           | 1617                   | 1445 | 1558          | 33    | 1555   |
| MT1S14    | 30             | 2009                          | 23                         | -24.1                           | 2001                   | 1896 | 1957          | 29    | 1958   |
| MT1S16    | 30             | 1872                          | 25                         | -23.2                           | 1875                   | 1730 | 1811          | 43    | 1820   |
| MT1S17    | 47.5           | 1876                          | 25                         | -18.4                           | 1878                   | 1733 | 1817          | 42    | 1826   |
| MT1S2.0   | 10             | 1332                          | 22                         | -21.1                           | 1300                   | 1186 | 1269          | 28    | 1278   |
| MT1S2.1   | 7.5            | 1274                          | 24                         | -18.9                           | 1276                   | 1180 | 1226          | 32    | 1229   |
| MT1S2.2   | 25             | 1831                          | 23                         | -19.6                           | 1824                   | 1708 | 1768          | 35    | 1769   |
| MT1S2.3   | 35             | 1952                          | 23                         | -17.1                           | 1969                   | 1827 | 1902          | 28    | 1901   |
| MT1S20    | 50             | 1761                          | 22                         | -22.1                           | 1731                   | 1605 | 1666          | 35    | 1662   |
| MT1S3.0   | 14.5           | 538                           | 22                         | -17.4                           | 627                    | 517  | 554           | 33    | 541    |
| MT1S4.1   | 16             | 657                           | 27                         | -17.9                           | 671                    | 559  | 613           | 38    | 601    |
| MT1S5.0   | 12             | 602                           | 22                         | -18.5                           | 652                    | 545  | 602           | 30    | 604    |
| MT1S6.0   | 25             | 595                           | 23                         | -19.4                           | 651                    | 541  | 600           | 31    | 605    |
| MT1S6.1   | 37             | 870                           | 25                         | -21.4                           | 904                    | 709  | 783           | 47    | 772    |
| MT1S7.2   | 50             | 1968                          | 26                         | -17.6                           | 1989                   | 1870 | 1919          | 31    | 1917   |
| PC1LS10.3 | 45.5           | 599                           | 23                         | -24.5                           | 651                    | 543  | 601           | 31    | 604    |
| PC1LS10.4 | 61             | 342                           | 32                         | -14.5                           | 484                    | 310  | 396           | 52    | 392    |
| PC1LS8.3  | 46             | 1208                          | 21                         | -22.3                           | 1223                   | 1065 | 1130          | 40    | 1128   |
| PC1RS1.1  | 14.5           | 300                           | 23                         | -24.9                           | 453                    | 300  | 378           | 44    | 390    |
| PC1RS1.3  | 38             | 324                           | 22                         | -22.8                           | 461                    | 308  | 385           | 44    | 386    |
| PC1RS5.2  | 29.5           | 1665                          | 28                         | -24.9                           | 1690                   | 1522 | 1572          | 38    | 1567   |
| PC1RS5.5  | 65.5           | 1089                          | 29                         | -17.7                           | 1058                   | 936  | 1000          | 36    | 995    |
| PC1S6.2   | 27.5           | 524                           | 23                         | -23.9                           | 622                    | 511  | 540           | 25    | 534    |
| PC1S7.2   | 23.5           | 201                           | 26                         | -28.7                           | 300                    | ...  | 172           | 93    | 176    |
| PC2S1.3   | 49             | 84                            | 28                         | -20.7                           | 260                    | 25   | 125           | 77    | 105    |
| PC2S3.1   | 21.5           | 134                           | 30                         | -18.4                           | 278                    | 8    | 142           | 81    | 134    |
| PC2S4.1   | 9              | 337                           | 27                         | -22.6                           | 476                    | 311  | 392           | 49    | 388    |
| PC4S3.3   | 42.5           | 1780                          | 22                         | -22.2                           | 1809                   | 1618 | 1691          | 47    | 1697   |
| PC4S3.4   | 53.5           | 1695                          | 31                         | -22.9                           | 1696                   | 1538 | 1607          | 44    | 1598   |
| PC4S4.1   | 17.5           | 1875                          | 21                         | -24.8                           | 1875                   | 1735 | 1818          | 40    | 1827   |
| PC4S6.2   | 33.5           | 370                           | 21                         | -20.3                           | 500                    | 320  | 421           | 58    | 445    |
| PC4S6.3   | 49.5           | 1503                          | 25                         | -20.8                           | 1517                   | 1327 | 1388          | 39    | 1382   |
| PC4S7.2   | 28.5           | 1116                          | 28                         | -22.8                           | 1171                   | 955  | 1019          | 38    | 1017   |
| PC5S1.3   | 38             | 1240                          | 27                         | -19.9                           | 1265                   | 1075 | 1184          | 54    | 1197   |
| PC5S10.1  | 8.5            | 861                           | 29                         | -27.6                           | 901                    | 695  | 774           | 47    | 765    |
| PC5S10.2  | 23.5           | 279                           | 24                         | -23.4                           | 432                    | 286  | 357           | 56    | 370    |
| PC5S6.2   | 23.5           | 48                            | 20                         | -21.1                           | 253                    | 33   | 85            | 66    | 53     |
| PC5S6.3   | 38.5           | 68                            | 21                         | -24.5                           | 255                    | 31   | 111           | 76    | 69     |
| PC5S8.1   | 11.5           | 225                           | 22                         | -21.7                           | 308                    | ...  | 211           | 88    | 185    |
| PC5S8.2   | 24             | 181                           | 28                         | -14.6                           | 297                    | ...  | 163           | 89    | 180    |
| PC5S9.2   | 23.5           | 1240                          | 29                         | ...                             | 1266                   | 1074 | 1182          | 55    | 1192   |
| UC1S6.4   | 58             | 1931                          | 31                         | -22.5                           | 1949                   | 1817 | 1878          | 37    | 1879   |
| UC1S8.1   | 11.5           | 350                           | 69                         | -25                             | 516                    | 288  | 396           | 75    | 399    |

Sample depths, uncalibrated radiocarbon ages (where SE is standard error), and calibrated ages from OxCal where the minimum (Min) and maximum (Max) represent the 95.4% confidence level. Additional Oxcal output includes the calibrated weighted mean, the associated error of that mean estimate (sigma), and median age.

**Supplementary Table S2.** Basic statistics for measured sediment depths.

| <b>ReachID</b> | <b>n</b> | <b>Min</b> | <b>Max</b> | <b>Mean</b> | <b>SD</b> | <b>SE</b> |
|----------------|----------|------------|------------|-------------|-----------|-----------|
| CCKUC1         | 85       | 0          | 100        | 27.6        | 25.3      | 2.7       |
| HCKPC4         | 100      | 0          | 71         | 28.0        | 21.9      | 2.2       |
| NSVAB1         | 181      | 0          | 170        | 36.7        | 33.7      | 2.5       |
| NSVAB4         | 440      | 0          | 154        | 55.5        | 35.2      | 1.7       |
| NSVMT1         | 144      | 0          | 175        | 17.2        | 25.5      | 2.1       |
| NSVPC1         | 123      | 0          | 85         | 20.2        | 22.7      | 2.0       |
| NSVPC5         | 91       | 0          | 97         | 22.7        | 24.5      | 2.6       |
| OCKPC2         | 82       | 0          | 72         | 14.3        | 15.8      | 1.7       |

Values represent measured depths (cm) of fine floodplain sediment along each of the eight field study site and n is the sample size.

**Supplementary Table S3.** Correlations for predictor variables, mean <sup>14</sup>C age, and sediment flux.

|                                                           | Elevation (m) | Valley Confinement (m m <sup>-1</sup> ) | Stream Gradient, Slope (m m <sup>-1</sup> ) | Stream Power (W m <sup>-1</sup> ) | Unit Stream Power (W m <sup>-2</sup> ) | Mean Depth (cm) | Mean Age (cal y BP) | Sediment Flux (kg yr <sup>-1</sup> m <sup>-1</sup> ) |
|-----------------------------------------------------------|---------------|-----------------------------------------|---------------------------------------------|-----------------------------------|----------------------------------------|-----------------|---------------------|------------------------------------------------------|
| Elevation (m)                                             | 1             |                                         |                                             |                                   |                                        |                 | <b>Y</b>            | <b>N</b>                                             |
| Valley Confinement (m m <sup>-1</sup> )                   | -0.63         | 1                                       |                                             |                                   |                                        |                 | <b>Y</b>            | <b>Y</b>                                             |
| Stream Gradient, Slope (m m <sup>-1</sup> )               | 0.61          | -0.06                                   | 1                                           |                                   |                                        |                 | <b>N</b>            | <b>Y</b>                                             |
| Stream Power (W m <sup>-1</sup> )                         | -0.27         | <b>0.69</b>                             | 0.56                                        | 1                                 |                                        |                 | <b>Y</b>            | <b>Y</b>                                             |
| Unit Stream Power (W m <sup>-2</sup> )                    | 0.29          | 0.17                                    | 0.58                                        | 0.36                              | 1                                      |                 | <b>N</b>            | <b>N</b>                                             |
| Mean Depth (cm)                                           | 0.17          | -0.24                                   | -0.1                                        | -0.5                              | 0.16                                   | 1               | <b>Y</b>            | <b>Y</b>                                             |
| Mean Age (cal y BP)                                       | 0.66          | <b>-0.73</b>                            | 0.27                                        | -0.41                             | 0.11                                   | 0.27            | 1                   |                                                      |
| Sediment Flux (Mg 1000 yr <sup>-1</sup> m <sup>-1</sup> ) | -0.25         | -0.5                                    | -0.58                                       | -0.66                             | -0.4                                   | 0.45            | 0.04                | 1                                                    |

Pearson correlation coefficients (*r*) for potential predictors variables, mean radiocarbon ages, and estimated floodplain sediment mass flux per unit valley length of seven study reaches. Values in bold indicate correlations significant at the 90% confidence level (*p* ≤ 0.1). Variables included (Y) are distinguished from variables excluded (N) in multiple regression for mean age and flux in the appropriate column.

**Supplementary Table S4.** Correlations for predictor variables of floodplain disturbance in the 2013 food.

|                                                 | Elevation (m) | Cumulative downstream distance (m) | Drainage Area (km <sup>2</sup> ) | Channel Slope (m/m) | Valley Confinement (m/m) | Stream Power (W/m) | Unit Stream Power (W/m <sup>2</sup> ) | Change in Stream Power (W/m) | Change in Unit Stream Power (W/m <sup>2</sup> ) | Change in Valley Confinement (m/m) | Net Upstream Deposition (m <sup>3</sup> ) | Net Sediment Deposition (m <sup>3</sup> ) |
|-------------------------------------------------|---------------|------------------------------------|----------------------------------|---------------------|--------------------------|--------------------|---------------------------------------|------------------------------|-------------------------------------------------|------------------------------------|-------------------------------------------|-------------------------------------------|
| Elevation (m)                                   | 1             |                                    |                                  |                     |                          |                    |                                       |                              |                                                 |                                    |                                           |                                           |
| Cumulative downstream distance (m)              | <b>-0.997</b> | 1                                  |                                  |                     |                          |                    |                                       |                              |                                                 |                                    |                                           |                                           |
| Drainage Area (km <sup>2</sup> )                | <b>-0.952</b> | 0.962                              | 1                                |                     |                          |                    |                                       |                              |                                                 |                                    |                                           |                                           |
| Channel Slope (m/m)                             | <b>0.263</b>  | <b>-0.253</b>                      | <b>-0.321</b>                    | 1                   |                          |                    |                                       |                              |                                                 |                                    |                                           |                                           |
| Valley Confinement (m/m)                        | <b>0.233</b>  | <b>-0.230</b>                      | -0.112                           | <b>-0.387</b>       | 1                        |                    |                                       |                              |                                                 |                                    |                                           |                                           |
| Stream Power (W/m)                              | <b>-0.206</b> | <b>0.217</b>                       | <b>0.168</b>                     | <b>0.849</b>        | <b>-0.377</b>            | 1                  |                                       |                              |                                                 |                                    |                                           |                                           |
| Unit Stream Power (W/m <sup>2</sup> )           | <b>-0.253</b> | <b>0.251</b>                       | <b>0.166</b>                     | <b>0.771</b>        | <b>-0.561</b>            | <b>0.906</b>       | 1                                     |                              |                                                 |                                    |                                           |                                           |
| Change in Stream Power (W/m)                    | -0.012        | 0.015                              | 0.029                            | <b>0.315</b>        | -0.044                   | <b>0.392</b>       | <b>0.226</b>                          | 1                            |                                                 |                                    |                                           |                                           |
| Change in Unit Stream Power (W/m <sup>2</sup> ) | 0.005         | 0.001                              | 0.012                            | <b>0.299</b>        | <b>-0.181</b>            | <b>0.346</b>       | <b>0.379</b>                          | 0.736                        | 1                                               |                                    |                                           |                                           |
| Change in Valley Confinement (m/m)              | 0.012         | -0.016                             | -0.015                           | -0.019              | <b>0.462</b>             | -0.006             | -0.112                                | -0.072                       | <b>-0.357</b>                                   | 1                                  |                                           |                                           |
| Net Upstream Deposition (m <sup>3</sup> )       | <b>-0.201</b> | <b>0.220</b>                       | <b>0.300</b>                     | <b>-0.262</b>       | <b>0.257</b>             | -0.146             | <b>-0.233</b>                         | -0.049                       | 0.001                                           | -0.144                             | 1                                         |                                           |
| Net Sediment Deposition (m <sup>3</sup> )       | <b>-0.241</b> | <b>0.256</b>                       | <b>0.300</b>                     | <b>-0.252</b>       | <b>0.261</b>             | -0.137             | <b>-0.230</b>                         | -0.020                       | -0.099                                          | 0.064                              | <b>0.693</b>                              | 1                                         |

Pearson correlation coefficients (r) for potential predictor variables, net disturbed volume of sediment from the 2013 flood along 155 reaches on North Saint Vrain Creek. Values in bold indicate correlations significant at the 90% confidence level ( $p \leq 0.01$ ). Source data are provided as a Source Data file. Source data are provided as a Source Data file.
